# Supplementary material for: Outshine to Outbid: Weather-Induced Sentiment and the Housing Market
Source: Atypon-hosted journal article supplement (doi:10.1287/mnsc.2019.3517), 2020-01-20
Supplement: mnsc.2019.3517.sm1.pdf [file mnsc.2019.3517.sm1.pdf]

**Internet Appendix**  
**For**  
**Outshine to Outbid: Weather-Induced Sentiment and the Housing Market**

Maggie Rong Hu<sup>1</sup> and Adrian D. Lee

This Internet Appendix reports the results of supplementary and robustness tests as described below:

|                                                                                              |    |
|----------------------------------------------------------------------------------------------|----|
| Figure IA1: Example of Subdivision Advertisement .....                                       | 2  |
| Table IA1: Day of the Week of Real Estate Subdivision Auctions in Sydney 1833 to 1983.....   | 3  |
| Table IA2: Sentiment and Housing Prices Using Weather Prior to Transaction.....              | 4  |
| Panel A: Using Lagged 1 Day Weather.....                                                     | 4  |
| Panel B: Using Moving Average $t-1$ to $t-3$ Day Weather.....                                | 5  |
| Panel C: Using Moving Average $t-1$ to $t-7$ Day Weather.....                                | 6  |
| Table IA3: Sentiment in Housing Auctions using Suburb/YQ Fixed Effects .....                 | 7  |
| Panel A: Sentiment Regressions using the Entire Sample.....                                  | 7  |
| Panel B: Sentiment Regressions using the Auction Sales Sample .....                          | 8  |
| Panel C: Sentiment Regressions using the Private Negotiation Sales Sample .....              | 8  |
| Table IA4: Sentiment in Housing Auctions Using De-seasoned and Standardized Sentiments ..... | 9  |
| Panel A: Sentiment Regressions using Full Sample.....                                        | 9  |
| Panel B: Sentiment Regressions using Auction Sales Sample .....                              | 10 |
| Panel C: Sentiment Regressions using the Private Negotiation Sales Sample .....              | 10 |
| Table IA5: Housing Market Dispersion on Auction Price .....                                  | 11 |

---

<sup>1</sup> Any queries on the content of this Internet Appendix could be directed to the corresponding author Maggie Hu. Email: [maggiuhu@cuhk.edu.hk](mailto:maggiuhu@cuhk.edu.hk); Tel: (852) 3943-8592. Correspondence address: Room 710, Cheng Yu Tung Building, No.12, Chak Cheung Street, Shatin, New Territories, Hong Kong Chinese University of Hong Kong.

**Figure IA1: Example of Subdivision Advertisement**

This figure is a subdivision advertisement from the New South Wales State Library Subdivision Plans significant collection, available online. It advertises land subdivisions in the suburb of Northbridge in Sydney's Lower North Shore. The sale is by auction on the grounds, wet or fine, on Saturday, February 26<sup>th</sup>, 1927 at 3:15pm.

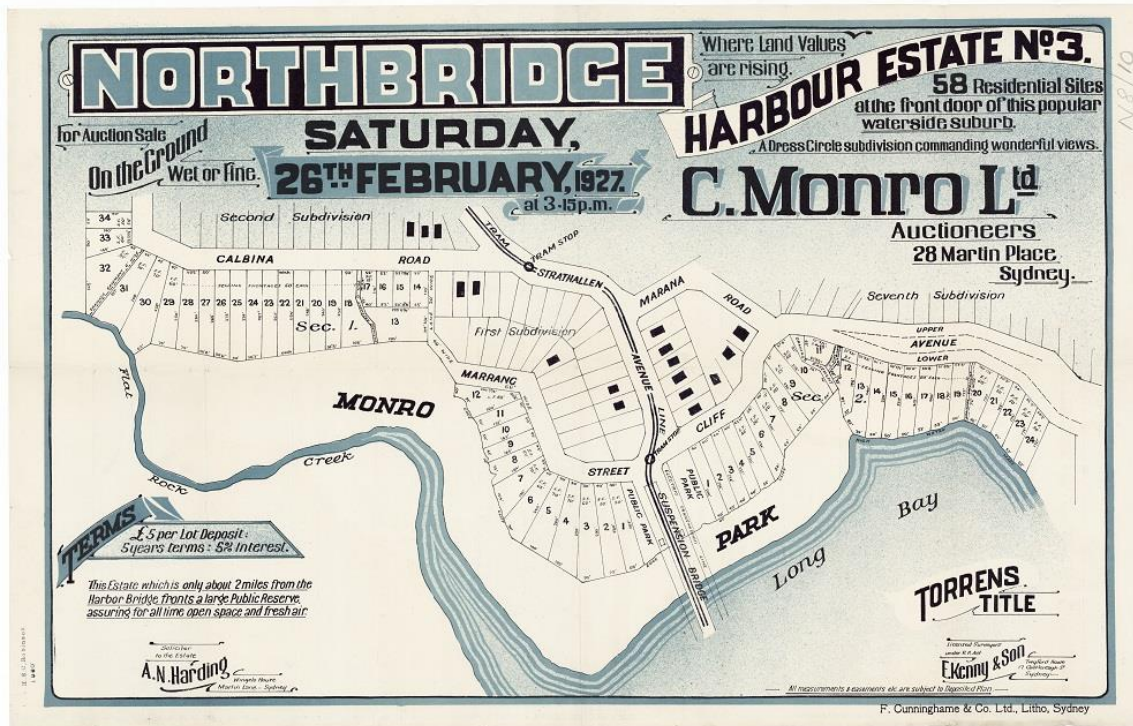

**Table IA1: Day of the Week of Real Estate Subdivision Auctions in Sydney 1833 to 1983**

This table reports the frequency of historical land subdivision auction dates by day of the week. We collect records of posters advertising new land subdivision sales in Sydney from the New South Wales State Library Subdivision Plans significant collection (<https://www.sl.nsw.gov.au/research-and-collections/significant-collections/subdivision-plans>). The advertisements primarily describe auctions, particularly if the record contains a date or day. Each record contains the call number, title, boundaries, and date. We remove duplicates, records without a day of the week, and records that are not subdivision advertisements such as diagrams, letters, prices lists and sketches.

| Years                    | Mon     | Tue     | Wed     | Thu     | Fri     | Sat    | Sun    | All Days |
|--------------------------|---------|---------|---------|---------|---------|--------|--------|----------|
| <i>Historical Sample</i> |         |         |         |         |         |        |        |          |
| No Year                  | 55      | 50      | 55      | 45      | 65      | 1,076  | 0      | 1,346    |
| 1833 to 1900             | 142     | 84      | 156     | 105     | 112     | 1,737  | 0      | 2,336    |
| 1901 to 1950             | 278     | 90      | 168     | 143     | 207     | 5,526  | 0      | 6,412    |
| 1951 to 1983             | 2       | 7       | 3       | 4       | 6       | 49     | 0      | 71       |
| All Years                | 477     | 231     | 382     | 297     | 390     | 8,388  | 0      | 10,165   |
| %                        | 4.69%   | 2.27%   | 3.76%   | 2.92%   | 3.84%   | 82.52% | 0.00%  | 100%     |
| <i>Our Sample</i>        |         |         |         |         |         |        |        |          |
| Auction                  | 3,873   | 10,277  | 13,940  | 14,713  | 1,784   | 89,446 | 1,089  | 135,122  |
| %                        | 2.87%   | 7.61%   | 10.32%  | 10.89%  | 1.32%   | 66.20% | 0.81%  | 100.00%  |
| Private Sale             | 109,640 | 112,615 | 112,295 | 113,632 | 159,752 | 57,436 | 21,055 | 686,425  |
| %                        | 15.97%  | 16.41%  | 16.36%  | 16.55%  | 23.27%  | 8.37%  | 3.07%  | 100.00%  |

**Table IA2: Sentiment and Housing Prices Using Weather Prior to Transaction**

This table reports coefficient estimates for the following hedonic model across the full sample of individual housing prices:

$$\ln(P_{ist}) = \alpha_0 + \beta_1 MAWeather_{t-1,t-l} + \beta_2 Auction_i + \beta_3 Auction_i * MAWeather_{t-1,t-l} + property\ char_i + \mu_s + \gamma_t + \varepsilon_{it}$$

Where  $\ln(P_{ist})$  denotes the natural logarithm of housing price for sale  $i$  in suburb  $s$  at time  $t$ ;  $Auction$  is a dummy of 1 if the home is sold at auction, 0 otherwise;  $MAWeather_{t-1,t-l}$  is the lagged moving average from  $t-1$  to  $t-l$  ( $l=1,3,7$ ) of one of the three sentiment measures for a home sold at time  $t$ ;  $property\ char$  are various property characteristics such as number of bedrooms, number of bathrooms, parking, property type, and area size;  $\mu_s$  is the suburb location specific fixed effects; and  $\gamma_t$  are year and quarter fixed effects. The three weather measures are *Rain*, *Solar*, and *Temp*. *Rain* is the amount of rain in millimetres for the transaction day. *Solar* is the amount of solar exposure for the transaction day. *Temp* is the maximum temperature in degrees Celsius for the transaction day. Coefficient estimates of sentiment measures and their interactions are multiplied by 1000 for display purposes. Other variables are described in Appendix 1. The sample is home sales in the Sydney metropolitan area from 2000 to 2014. Standard errors are denoted in parentheses. \*\*\*, \*\*, \* signifies statistical significance at the 1, 5, and 10 percent level, respectively. Panel A uses the full sample using lagged 1 day weather, Panels B uses lagged 3 day moving average weather and Panel C uses lagged 7 day moving average weather.

**Panel A: Using Lagged 1 Day Weather**

| Variables                    | (1)<br>log(price)    | (2)<br>log(price)   | (3)<br>log(price)   |
|------------------------------|----------------------|---------------------|---------------------|
| Auction                      | 0.070***<br>(0.003)  | 0.061***<br>(0.003) | 0.061***<br>(0.005) |
| Rain <sub>t-1</sub>          | -0.103***<br>(0.028) |                     |                     |
| Auction*Rain <sub>t-1</sub>  | -0.313***<br>(0.109) |                     |                     |
| Solar <sub>t-1</sub>         |                      | -0.021<br>(0.043)   |                     |
| Auction*Solar <sub>t-1</sub> |                      | 0.537***<br>(0.099) |                     |
| Temp <sub>t-1</sub>          |                      |                     | 0.181**<br>(0.086)  |
| Auction*Temp <sub>t-1</sub>  |                      |                     | 0.390**<br>(0.193)  |
| Constant                     | 3.663***<br>(0.468)  | 3.226***<br>(0.473) | 3.713***<br>(0.469) |
| Housing Char.                | Yes                  | Yes                 | Yes                 |
| Suburb F.E.                  | Yes                  | Yes                 | Yes                 |
| Monthly Time Trend           | Yes                  | Yes                 | Yes                 |
| Year and Quarter F.E.        | Yes                  | Yes                 | Yes                 |
| Cluster S.E.                 | Suburb               | Suburb              | Suburb              |
| N                            | 821,547              | 806,377             | 821,547             |
| Adj Rsq                      | 0.840                | 0.841               | 0.840               |

**Panel B: Using Moving Average  $t-1$  to  $t-3$  Day Weather**

| Variables                        | (1)<br>log(price)    | (2)<br>log(price)   | (3)<br>log(price)   |
|----------------------------------|----------------------|---------------------|---------------------|
| Auction                          | 0.070***<br>(0.003)  | 0.058***<br>(0.003) | 0.057***<br>(0.006) |
| Rain <sub>t-1,t-3</sub>          | -0.195***<br>(0.042) |                     |                     |
| Auction*Rain <sub>t-1,t-3</sub>  | -0.221<br>(0.140)    |                     |                     |
| Solar <sub>t-1,t-3</sub>         |                      | 0.005<br>(0.063)    |                     |
| Auction*Solar <sub>t-1,t-3</sub> |                      | 0.707***<br>(0.117) |                     |
| Temp <sub>t-1,t-3</sub>          |                      |                     | 0.273**<br>(0.124)  |
| Auction*Temp <sub>t-1,t-3</sub>  |                      |                     | 0.569***<br>(0.210) |
| Constant                         | 3.656***<br>(0.468)  | 3.239***<br>(0.473) | 3.710***<br>(0.467) |
| Housing Char.                    | Yes                  | Yes                 | Yes                 |
| Suburb F.E.                      | Yes                  | Yes                 | Yes                 |
| Monthly Time Trend               | Yes                  | Yes                 | Yes                 |
| Year and Quarter F.E.            | Yes                  | Yes                 | Yes                 |
| Cluster S.E.                     | Suburb               | Suburb              | Suburb              |
| N                                | 821,547              | 806,377             | 821,547             |
| Adj Rsq                          | 0.840                | 0.841               | 0.840               |

**Panel C: Using Moving Average  $t-1$  to  $t-7$  Day Weather**

| Variables                        | (1)<br>log(price)    | (2)<br>log(price)   | (3)<br>log(price)   |
|----------------------------------|----------------------|---------------------|---------------------|
| Auction                          | 0.070***<br>(0.003)  | 0.056***<br>(0.003) | 0.052***<br>(0.006) |
| Rain <sub>t-1,t-7</sub>          | -0.338***<br>(0.060) |                     |                     |
| Auction*Rain <sub>t-1,t-7</sub>  | -0.310*<br>(0.173)   |                     |                     |
| Solar <sub>t-1,t-7</sub>         |                      | 0.067<br>(0.086)    |                     |
| Auction*Solar <sub>t-1,t-7</sub> |                      | 0.829***<br>(0.122) |                     |
| Temp <sub>t-1,t-7</sub>          |                      |                     | 0.339**<br>(0.151)  |
| Auction*Temp <sub>t-1,t-7</sub>  |                      |                     | 0.771***<br>(0.234) |
| Constant                         | 3.589***<br>(0.468)  | 3.259***<br>(0.471) | 3.714***<br>(0.466) |
| Housing Char.                    | Yes                  | Yes                 | Yes                 |
| Suburb F.E.                      | Yes                  | Yes                 | Yes                 |
| Monthly Time Trend               | Yes                  | Yes                 | Yes                 |
| Year and Quarter F.E.            | Yes                  | Yes                 | Yes                 |
| Cluster S.E.                     | Suburb               | Suburb              | Suburb              |
| N                                | 821,547              | 806,377             | 821,547             |
| Adj Rsq                          | 0.840                | 0.841               | 0.840               |

**Table IA3: Sentiment in Housing Auctions using Suburb/YQ Fixed Effects**

This table follows the specifications of Table 3, except it uses Suburb and Year/Quarter Fixed Effects and clustered standard errors at the Suburb level by Year/Quarter. All sentiment measures are standardized by subtracting the sample average and dividing by the sample standard deviation. Coefficient estimates of sentiment measures and their interactions are multiplied by 1000 for display purposes. Standard errors are denoted in parentheses. \*\*\*, \*\*, \* signifies statistical significance at the 1, 5, and 10 percent level, respectively. Panel A presents the result using the full sample, while Panels B and C use the auction sale sample and private negotiation sample, respectively.

**Panel A: Sentiment Regressions using the Entire Sample**

| Variables         | (1)<br>log(price)    | (2)<br>log(price)    | (3)<br>log(price)   | (4)<br>log(price)   |
|-------------------|----------------------|----------------------|---------------------|---------------------|
| SurveySenti       | -0.712<br>(0.650)    |                      |                     |                     |
| Auction*SurveySen | 11.278***<br>(1.053) |                      |                     |                     |
| Rain              |                      | -0.321<br>(0.295)    |                     |                     |
| Auction*Rain      |                      | -2.633***<br>(0.792) |                     |                     |
| Solar             |                      |                      | -0.581*<br>(0.351)  |                     |
| Auction*Solar     |                      |                      | 5.451***<br>(0.930) |                     |
| Temp              |                      |                      |                     | 0.305<br>(0.372)    |
| Auction*Temp      |                      |                      |                     | 3.297***<br>(0.906) |
| Auction           | 0.065***<br>(0.001)  | 0.065***<br>(0.001)  | 0.065***<br>(0.001) | 0.065***<br>(0.001) |
| Constant          | 3.363***<br>(0.467)  | 3.361***<br>(0.465)  | 3.088***<br>(0.469) | 3.418***<br>(0.465) |
| Housing Char.     | Yes                  | Yes                  | Yes                 | Yes                 |
| Suburb/YQ F.E.    | Yes                  | Yes                  | Yes                 | Yes                 |
| Monthly Time      | Yes                  | Yes                  | Yes                 | Yes                 |
| Cluster S.E.      | Suburb/YQ            | Suburb/YQ            | Suburb/YQ           | Suburb/YQ           |
| N                 | 821,547              | 821,547              | 806,377             | 821,547             |
| Adj Rsq           | 0.848                | 0.848                | 0.849               | 0.848               |

**Panel B: Sentiment Regressions using the Auction Sales Sample**

| Variables      | (1)<br>log(price) | (2)<br>log(price)    | (3)<br>log(price)   | (4)<br>log(price)  |
|----------------|-------------------|----------------------|---------------------|--------------------|
| SurveySenti    | 0.013<br>(1.923)  |                      |                     |                    |
| Rain           |                   | -3.073***<br>(0.817) |                     |                    |
| Solar          |                   |                      | 3.150***<br>(1.083) |                    |
| Temp           |                   |                      |                     | 2.040**<br>(1.040) |
| Constant       | 1.544<br>(1.427)  | 1.391<br>(1.427)     | 0.909<br>(1.451)    | 1.600<br>(1.429)   |
| Housing Char.  | Yes               | Yes                  | Yes                 | Yes                |
| Suburb/YQ F.E. | Yes               | Yes                  | Yes                 | Yes                |
| Monthly Time   | Yes               | Yes                  | Yes                 | Yes                |
| Cluster S.E.   | Suburb/YQ         | Suburb/YQ            | Suburb/YQ           | Suburb/YQ          |
| N              | 135,122           | 135,122              | 132,400             | 135,122            |
| Adj Rsq        | 0.806             | 0.806                | 0.807               | 0.806              |

**Panel C: Sentiment Regressions using the Private Negotiation Sales Sample**

| Variables      | (1)<br>log(price)   | (2)<br>log(price)   | (3)<br>log(price)   | (4)<br>log(price)   |
|----------------|---------------------|---------------------|---------------------|---------------------|
| SurveySenti    | 1.262*<br>(0.678)   |                     |                     |                     |
| Rain           |                     | -0.318<br>(0.296)   |                     |                     |
| Solar          |                     |                     | -0.448<br>(0.352)   |                     |
| Temp           |                     |                     |                     | 0.522<br>(0.375)    |
| Constant       | 3.841***<br>(0.497) | 3.772***<br>(0.494) | 3.553***<br>(0.498) | 3.776***<br>(0.494) |
| Housing Char.  | Yes                 | Yes                 | Yes                 | Yes                 |
| Suburb/YQ F.E. | Yes                 | Yes                 | Yes                 | Yes                 |
| Monthly Time   | Yes                 | Yes                 | Yes                 | Yes                 |
| Cluster S.E.   | Suburb/YQ           | Suburb/YQ           | Suburb/YQ           | Suburb/YQ           |
| N              | 686,425             | 686,425             | 673,977             | 686,425             |
| Adj Rsq        | 0.848               | 0.848               | 0.849               | 0.848               |

**Table IA4: Sentiment in Housing Auctions Using De-seasoned and Standardized Sentiments**

This table follows Table 3 except that sentiment measures are de-seasoned and standardized. Sentiment measures are de-seasoned by subtracting the average daily measures over the past three years for the same month. De-seasoning removes potential trends in the sentiment variables. The de-seasoned measures are then standardized by subtracting the sample average and dividing by the sample standard deviation. Coefficient estimates of sentiment measures and their interactions are multiplied by 1000 for display purposes. Standard errors are denoted in parentheses. \*\*\*, \*\*, \* signifies statistical significance at the 1, 5, and 10 percent level, respectively. Panel A presents the result using the full sample, while Panels B and C use the auction sale sample and private negotiation sample, respectively.

**Panel A: Sentiment Regressions using Full Sample**

| Variables           | (1)<br>log(price)   | (2)<br>log(price)    | (3)<br>log(price)   | (4)<br>log(price)   |
|---------------------|---------------------|----------------------|---------------------|---------------------|
| SurveySenti         | 9.910***<br>(0.435) |                      |                     |                     |
| Auction*SurveySenti | 4.106***<br>(1.016) |                      |                     |                     |
| Rain                |                     | -0.924***<br>(0.298) |                     |                     |
| Auction*Rain        |                     | -1.164<br>(0.758)    |                     |                     |
| Solar               |                     |                      | 0.535*<br>(0.288)   |                     |
| Auction*Solar       |                     |                      | 5.706***<br>(0.890) |                     |
| Temp                |                     |                      |                     | 1.282***<br>(0.295) |
| Auction*Temp        |                     |                      |                     | 0.868<br>(0.810)    |
| Auction             | 0.069***<br>(0.003) | 0.070***<br>(0.003)  | 0.069***<br>(0.003) | 0.069***<br>(0.003) |
| Constant            | 3.645***<br>(0.468) | 3.649***<br>(0.467)  | 1.909***<br>(0.488) | 3.670***<br>(0.468) |
| Housing Char.       | Yes                 | Yes                  | Yes                 | Yes                 |
| Suburb F.E.         | Yes                 | Yes                  | Yes                 | Yes                 |
| Monthly Time Trend  | Yes                 | Yes                  | Yes                 | Yes                 |
| Year Quarter F.E.   | Yes                 | Yes                  | Yes                 | Yes                 |
| Cluster S.E.        | Suburb              | Suburb               | Suburb              | Suburb              |
| N                   | 821,547             | 821,547              | 793,326             | 821,547             |
| Adj Rsq             | 0.840               | 0.840                | 0.841               | 0.840               |

**Panel B: Sentiment Regressions using Auction Sales Sample**

| Variables    | (1)<br>log(price)    | (2)<br>log(price)    | (3)<br>log(price)   | (4)<br>log(price)   |
|--------------|----------------------|----------------------|---------------------|---------------------|
| SurveySenti  | 12.573***<br>(1.010) |                      |                     |                     |
| Rain         |                      | -2.697***<br>(0.676) |                     |                     |
| Solar        |                      |                      | 5.109***<br>(0.754) |                     |
| Temp         |                      |                      |                     | 2.672***<br>(0.716) |
| Constant     | 1.390<br>(1.156)     | 1.512<br>(1.144)     | -1.012<br>(1.179)   | 1.710<br>(1.150)    |
| Housing      | Yes                  | Yes                  | Yes                 | Yes                 |
| Suburb F.E.  | Yes                  | Yes                  | Yes                 | Yes                 |
| Monthly Time | Yes                  | Yes                  | Yes                 | Yes                 |
| Year Quarter | Yes                  | Yes                  | Yes                 | Yes                 |
| Cluster S.E. | Suburb               | Suburb               | Suburb              | Suburb              |
| N            | 135,122              | 135,122              | 130,178             | 135,122             |
| Adj Rsq      | 0.796                | 0.796                | 0.796               | 0.796               |

**Panel C: Sentiment Regressions using the Private Negotiation Sales Sample**

| Variables    | (1)<br>log(price)    | (2)<br>log(price)    | (3)<br>log(price)   | (4)<br>log(price)   |
|--------------|----------------------|----------------------|---------------------|---------------------|
| SurveySenti  | 10.110***<br>(0.431) |                      |                     |                     |
| Rain         |                      | -0.805***<br>(0.296) |                     |                     |
| Solar        |                      |                      | 0.512*<br>(0.287)   |                     |
| Temp         |                      |                      |                     | 1.075***<br>(0.295) |
| Constant     | 4.052***<br>(0.521)  | 4.014***<br>(0.522)  | 2.460***<br>(0.530) | 4.016***<br>(0.522) |
| Housing      | Yes                  | Yes                  | Yes                 | Yes                 |
| Suburb F.E.  | Yes                  | Yes                  | Yes                 | Yes                 |
| Monthly      | Yes                  | Yes                  | Yes                 | Yes                 |
| Year Quarter | Yes                  | Yes                  | Yes                 | Yes                 |
| Cluster S.E. | Suburb               | Suburb               | Suburb              | Suburb              |
| N            | 686,425              | 686,425              | 663,148             | 686,425             |
| Adj Rsq      | 0.839                | 0.839                | 0.840               | 0.839               |

**Table IA5: Housing Market Dispersion on Auction Price**

This table estimates the effect of dispersion or uncertainty on auction price. We estimate a hedonic model including auction in addition to the lagged quarterly housing survey-based dispersion and sentiment measures, using the auction sale sample as follows:

$$\ln(P_{ist}) = \alpha_0 + \beta_1 Disp_t + \beta_2 Sentiment_t + \beta_3 Disp_t * Sentiment_t + property\ char_i + \mu_s + \gamma_t + \varepsilon_{it}$$

The sample is home sales in the Sydney metropolitan area from July 2009 to December 2014. Quarterly housing price expectations survey data for New South Wales is sourced from the Melbourne Institute, and it starts from 2009 too. Every quarter, survey respondents are asked about their views on house price movements in the next twelve months. We measure house price uncertainty by the standard deviation of responses in the prior quarter as:

$$Disp_t = \sqrt{\frac{\sum_{i=1}^5 w_{it} (x_{it} - \bar{x}_t)^2}{\sum_{i=1}^5 w_{it}}} \text{ with } \bar{x}_t = (\sum_{i=1}^5 w_{it} x_{it}) / \sum_{i=1}^5 w_{it}$$

where  $w_{it}$  is the weight of responses in each of the five categories (more than 10% fall, between -10% and 0, 0, between 0 and 10% increase, and more than 10% increase) in quarter  $t$ .  $x_{it}$  is the values assigned to each category (from -2 to 2 with more than 10% fall assigned with a value of -2, between -10% and 0 assigned a value of -1, etc.).  $\bar{x}_t^*$  is the weighted mean of responses. All sentiment measures and  $Disp_t$  are standardized by subtracting the sample average and dividing by the sample standard deviation. \*\*\*, \*\*, \* signifies statistical significance at the 1, 5, and 10 percent level, respectively.

| Variables         | (1)<br>log(price)  | (3)<br>log(price)   | (4)<br>log(price)    | (5)<br>log(price)   | (6)<br>log(price)   |
|-------------------|--------------------|---------------------|----------------------|---------------------|---------------------|
| Disp              | 0.003**<br>(0.001) | 0.004***<br>(0.001) | 0.004***<br>(0.001)  | 0.003**<br>(0.001)  | 0.003**<br>(0.001)  |
| SurveySenti       |                    | 6.960***<br>(1.786) |                      |                     |                     |
| Disp*SurveySenti  |                    | -3.011<br>(1.839)   |                      |                     |                     |
| Rain              |                    |                     | -3.207***<br>(0.953) |                     |                     |
| Disp*Rain         |                    |                     | -1.091<br>(0.887)    |                     |                     |
| Solar             |                    |                     |                      | 6.250***<br>(1.161) |                     |
| Disp*Solar        |                    |                     |                      | -0.486<br>(1.097)   |                     |
| Temp              |                    |                     |                      |                     | 5.644***<br>(1.101) |
| Disp*Temp         |                    |                     |                      |                     | 0.305<br>(1.034)    |
| Constant          | 2.103<br>(1.588)   | 1.599<br>(1.622)    | 2.495<br>(1.616)     | 3.013*<br>(1.605)   | 2.496<br>(1.583)    |
| Housing Char.     | Yes                | Yes                 | Yes                  | Yes                 | Yes                 |
| Suburb F.E.       | Yes                | Yes                 | Yes                  | Yes                 | Yes                 |
| Year Quarter F.E. | Yes                | Yes                 | Yes                  | Yes                 | Yes                 |
| Cluster S.E.      | Yes                | Yes                 | Yes                  | Yes                 | Yes                 |
| N                 | 55,149             | 55,149              | 55,149               | 54,686              | 55,149              |
| Adj Rsq           | 0.820              | 0.820               | 0.820                | 0.820               | 0.820               |
